# Supplementary material
Source: PubMed Central journal article supplement (PMC3484658)
Supplement: mmc1.pdf [file mmc1.pdf]

The American Journal of Human Genetics, 91

## **Supplemental Data**

### **Genome-wide Linkage and Association Analyses**

#### **Implicate *FASN* in Predisposition to Uterine Leiomyomata**

Stacey L. Eggert, Karen L. Huyck, Priya Somasundaram, Raghava Kavalla, Elizabeth A. Stewart, Ake T. Lu, Jodie N. Painter, Grant W. Montgomery, Sarah E. Medland, Dale R. Nyholt, Susan A. Treloar, Krina T. Zondervan, Andrew C. Heath, Pamela A.F. Madden, Lynda Rose, Paul M. Ridker, Daniel I. Chasman, Nicholas G. Martin, Rita M. Cantor, and Cynthia C. Morton

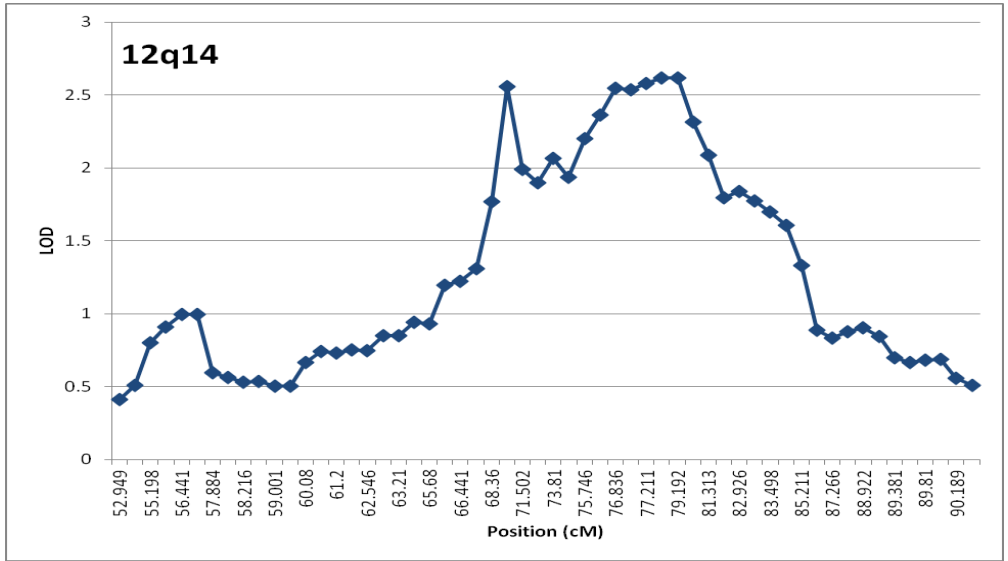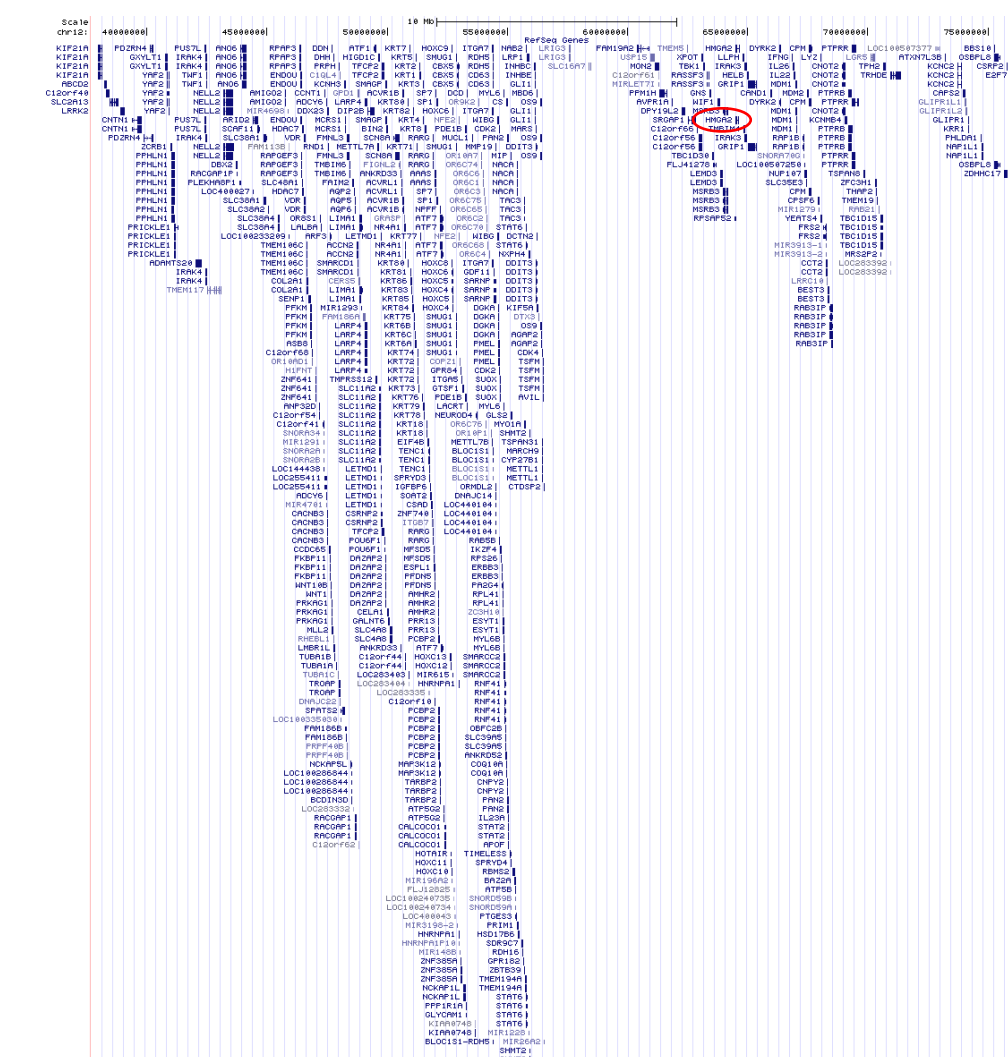

Figure S1. FGFF Linkage Peak at 12q14 with *HMGA2* Circled in Red

A

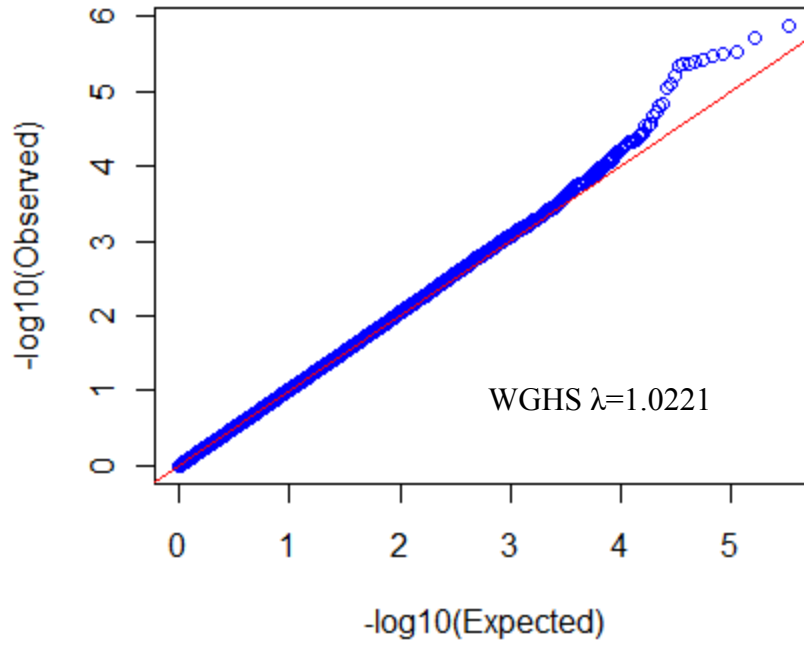

B

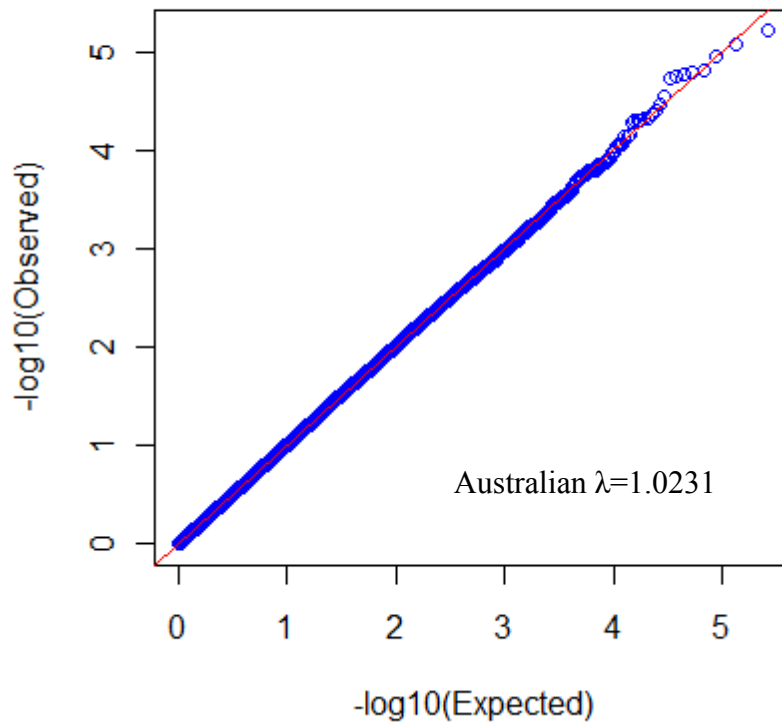

**Figure S2. Quantile-Quantile Plot of (A) WGHS GWAS Results and (B) Australian GWAS Results**

The p values observed in the studies are compared to the p values expected under the null hypothesis.

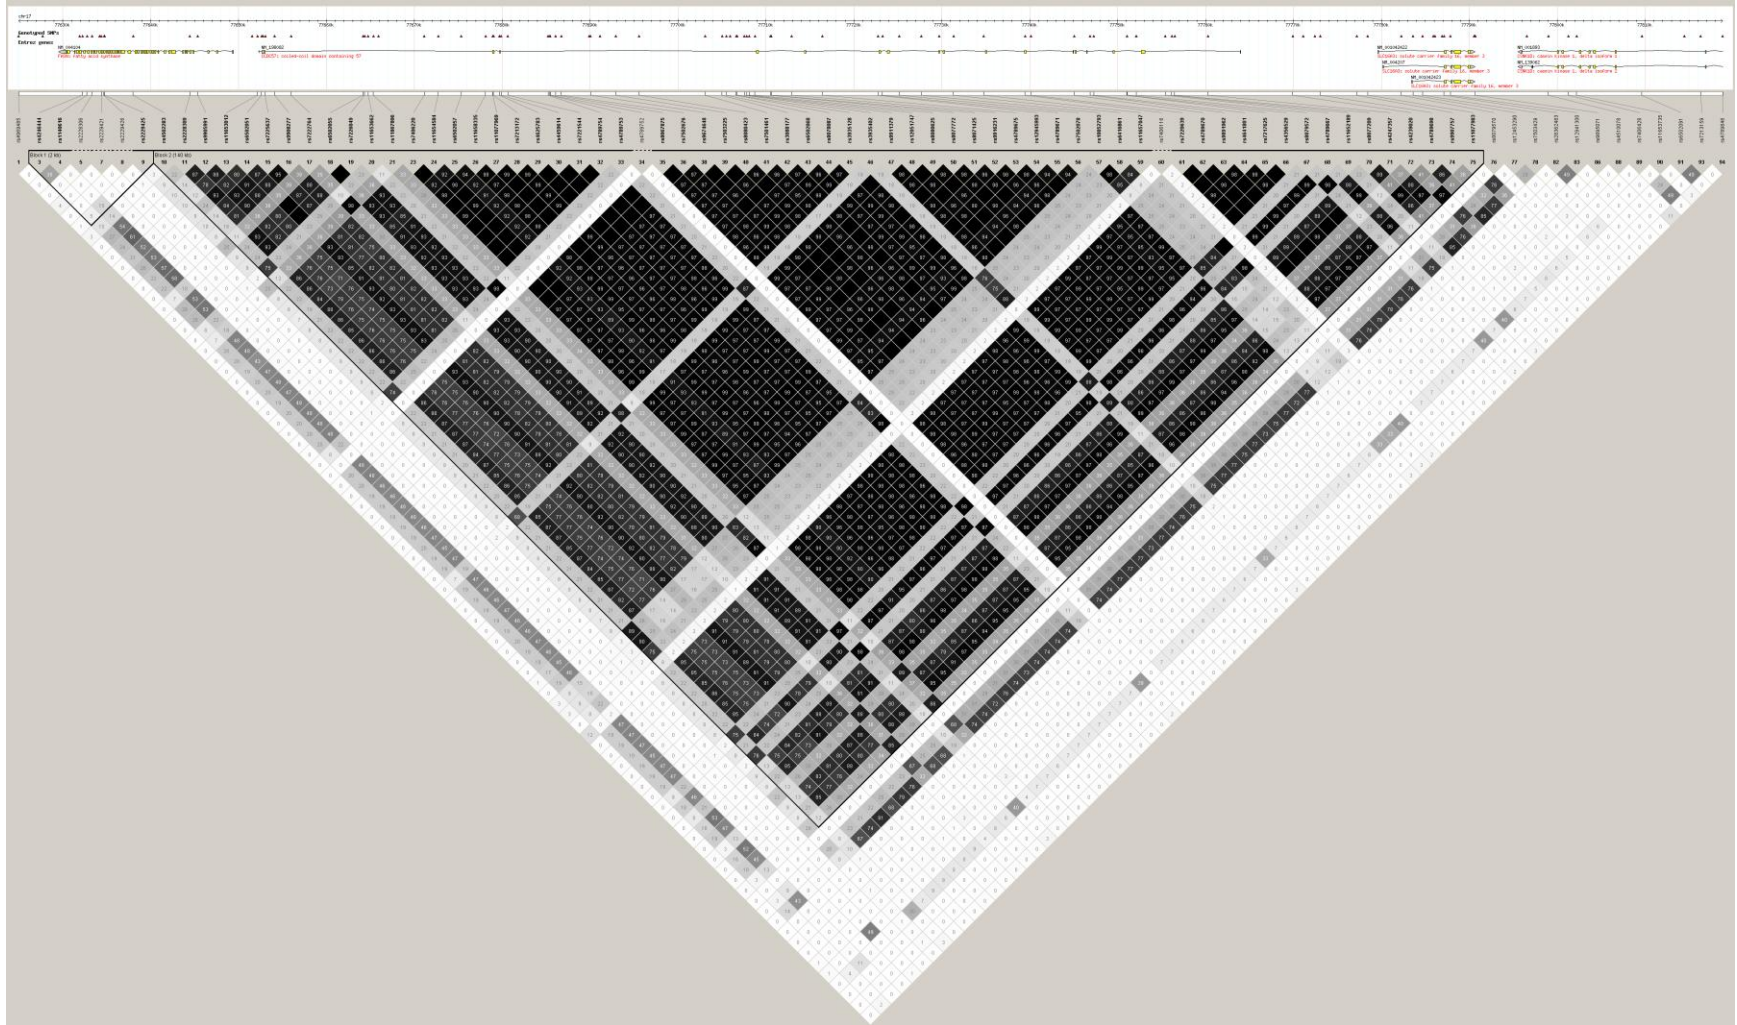

Figure S3. HapMap Generated LD Plot of Candidate Region on Chromosome 17

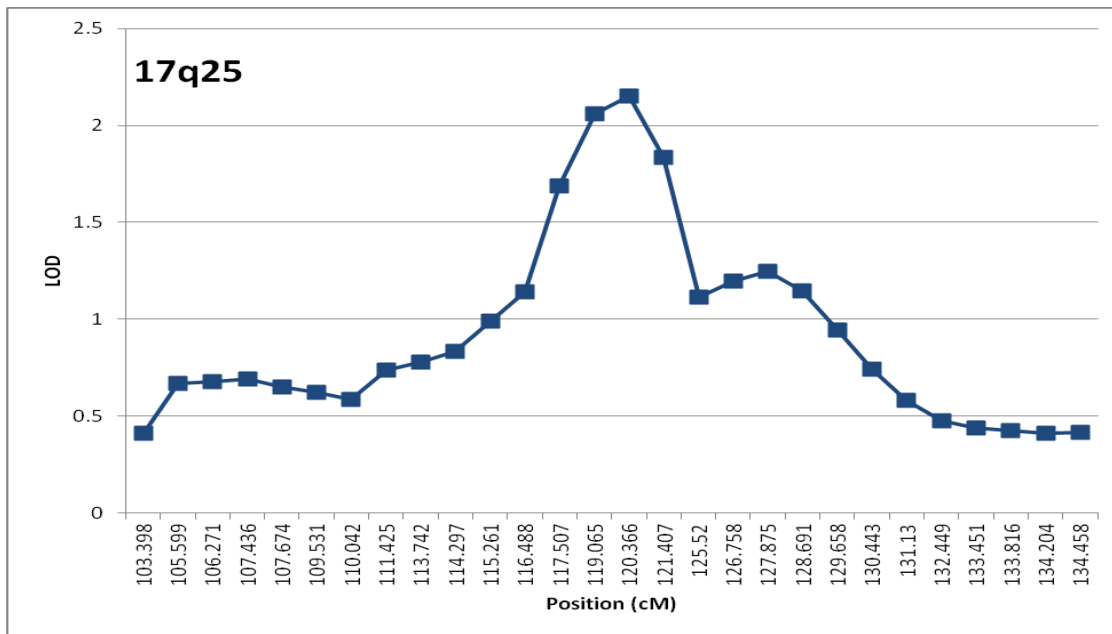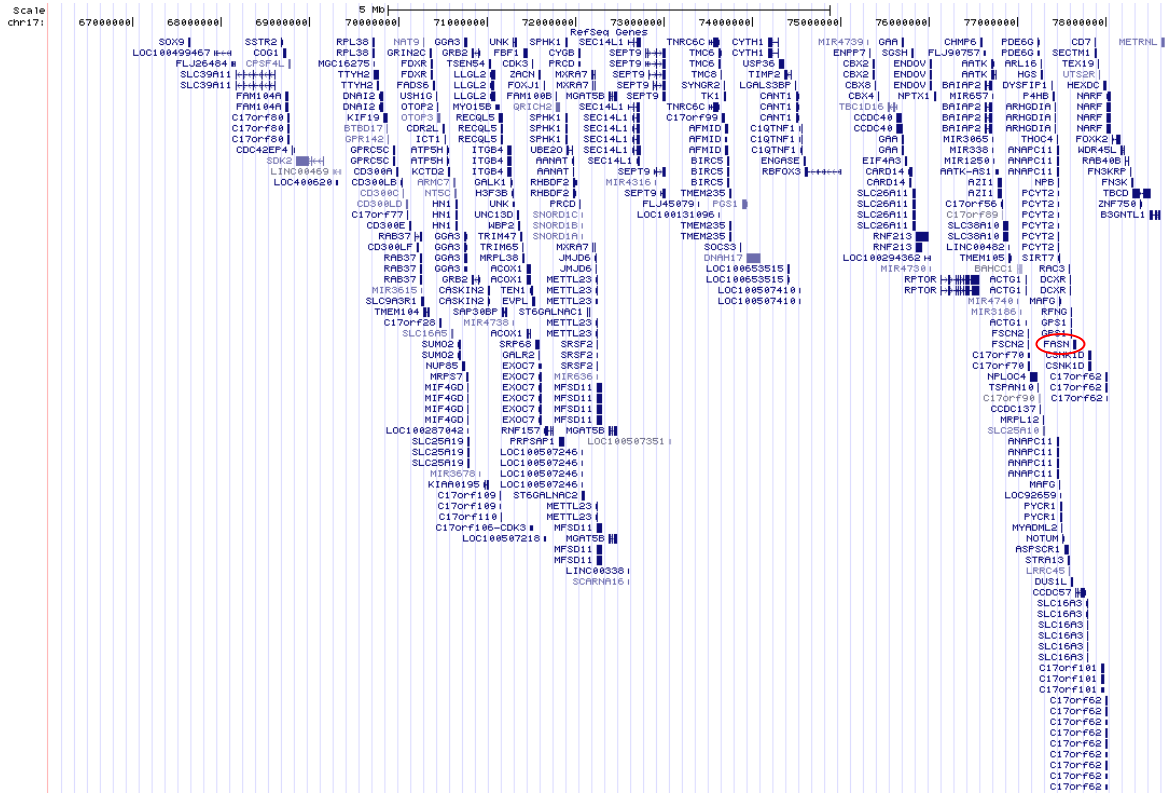

Figure S4. FGFF Linkage Peak at 17q25 with *FASN* Circled in Red

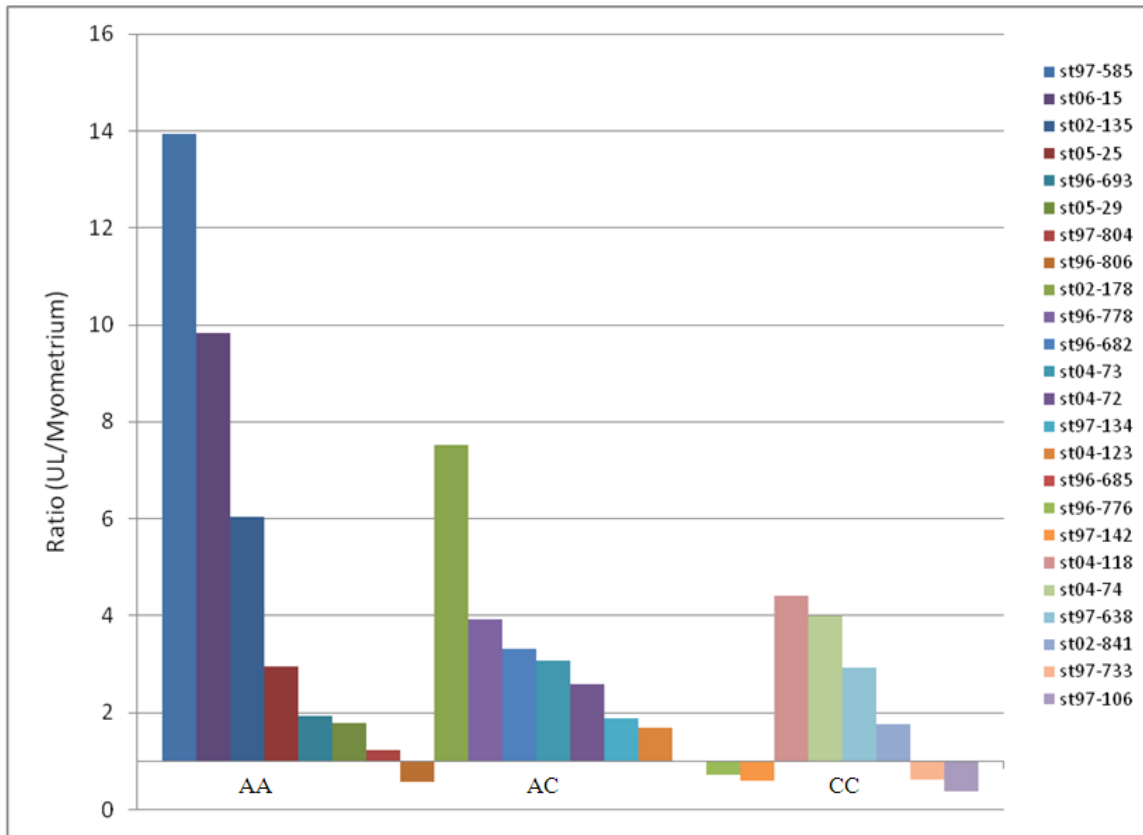

**Figure S5. Ratio of FAS Protein Expression in Matched UL/Myometrium Samples Grouped by rs4247357 Genotype**

Each bar represents the ratio from one woman.

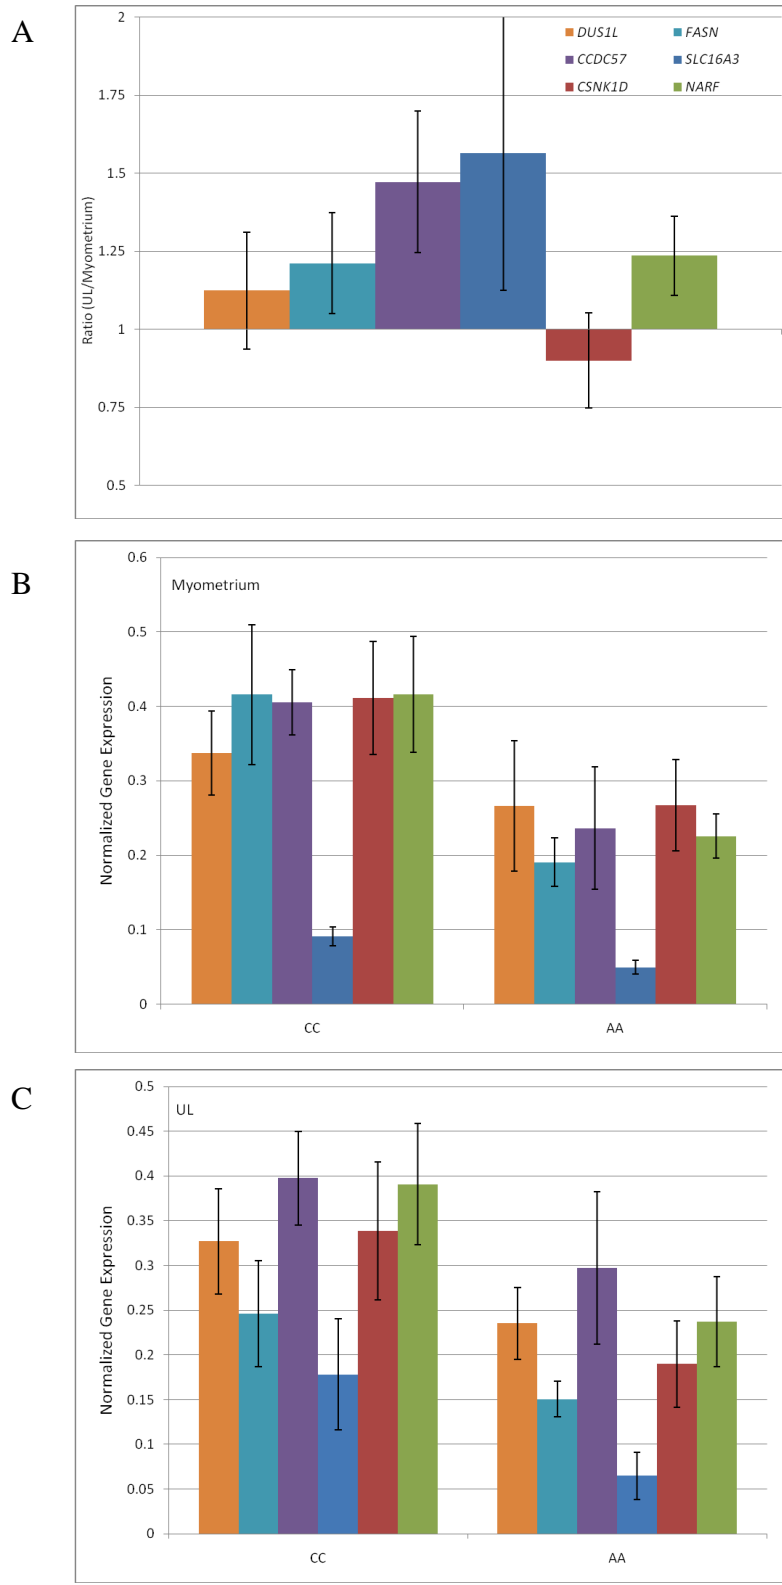

**Figure S6. mRNA Expression by qPCR of *FASN*, *CCDC57*, *SLC16A3*, and Three Genes in Direct Proximity (*DUS1L*, *CSNK1D*, *NARF*) in (A) Myometrium and Matched UL Samples (B) Myometrium with the Major (CC) and Minor (AA) Allele of rs4247357 and (C) UL with the Major (CC) and Minor (AA) Allele of rs4247357**

**Table S1. Demographics of the FGFF, WGHS, and Australian Cohorts**

|                         |                                   | WGHS All<br>(5,233) | WGHS<br>Cases<br>(746) | WGHS<br>Controls<br>(4487) | p Value  | Australian<br>All (1,094) | Australian<br>Cases (484) | Australian<br>Controls<br>(610) | p Value  | FGFF Sisters<br>(522) |
|-------------------------|-----------------------------------|---------------------|------------------------|----------------------------|----------|---------------------------|---------------------------|---------------------------------|----------|-----------------------|
| Age in years<br>(yrs)   | Yrs<br>Median (IQR)               | 52.9<br>(48.9-59.0) | 52.3<br>(48.8-56.9)    | 52.5<br>(48.7-58.0)        | 0.0038   | 41.0<br>(34.0-50.0)       | 44.0<br>(37.0-51.0)       | 39.0<br>(34.0-48.0)             | 0.0001   | 47.0<br>(41.0-53.0)   |
| BMI                     | kg/m <sup>2</sup><br>Median (IQR) | 24.8<br>(22.3-28.3) | 25.0<br>(22.6-28.2)    | 24.2<br>(22.0-27.4)        | 0.1595   | 23.6<br>(21.5-27.1)       | 24.8<br>(22.3-28.3)*      | 23.4<br>(21.3-26.5)             | 0.0019   | 24.1<br>(22.0-27.4)** |
| Height                  | Inches<br>Median (IQR)            | 65.0<br>(63.0-66.0) | 64.0<br>(63.0-66.0)    | 65.0<br>(63.0-66.0)        | 0.0528   | 63.8<br>(61.8-65.4)       | 63.4<br>(61.8-65.4)*      | 63.8<br>(61.8-65.7)             | 0.0195   | 65.0<br>(63.0-66.75)  |
| Age at<br>menarche      | Yr<br>Median (IQR)                | 12.0<br>(12.0-13.0) | 12.0<br>(11.0-13.0)    | 12.0<br>(12.0-13.0)        | 2.82E-05 | 13.0<br>(12.0-14.0)       | 13.0<br>(12.0-14.0)       | 13.0<br>(12.0-14.0)             | 0.0069   | 12.0<br>(12.0-13.0)   |
| Hysterectomy<br>history | Hysterectomy<br>N (%)             |                     |                        |                            |          | 312<br>(28.5%)            | 263<br>(56.1%)            | 49<br>(8.3%)                    | 3.77E-28 | 165<br>(30.1%)        |

\*BMI and height were only available for 175 Australian cases.

\*\*BMI is only available for 491 FGFF sisters.



**Table S2. WGHS Genome-wide Association Analysis Results ( $p < 10^{-4}$ )**

| CHR | SNP        | Position (bp) | F_A     | F_U     | A2 | CHISQ | p Value  |
|-----|------------|---------------|---------|---------|----|-------|----------|
| 1   | rs2268179  | 22287371      | 0.2091  | 0.1588  | C  | 23.37 | 1.34E-06 |
| 17  | rs4247357  | 77760277      | 0.467   | 0.4014  | C  | 22.64 | 1.95E-06 |
| 17  | rs6502057  | 77675348      | 0.4628  | 0.3977  | G  | 21.78 | 3.06E-06 |
| 15  | rs2903332  | 78340261      | 0.3124  | 0.2542  | G  | 21.75 | 3.10E-06 |
| 17  | rs11077969 | 77678921      | 0.4655  | 0.4017  | G  | 21.31 | 3.91E-06 |
| 17  | rs7502078  | 77725167      | 0.4678  | 0.4044  | C  | 21.24 | 4.04E-06 |
| 17  | rs7213172  | 77678991      | 0.4657  | 0.4023  | A  | 21.16 | 4.23E-06 |
| 17  | rs8080423  | 77695567      | 0.4672  | 0.4039  | A  | 21.1  | 4.36E-06 |
| 17  | rs7406163  | 77679677      | 0.4772  | 0.4128  | A  | 21.06 | 4.46E-06 |
| 17  | rs7221544  | 77680625      | 0.4664  | 0.4042  | A  | 20.41 | 6.26E-06 |
| 9   | rs11139665 | 84451020      | 0.05295 | 0.03042 | A  | 19.98 | 7.84E-06 |
| 22  | rs732110   | 26345321      | 0.1166  | 0.08168 | A  | 19.73 | 8.90E-06 |
| 5   | rs30523    | 132138941     | 0.1516  | 0.1125  | G  | 18.71 | 1.52E-05 |
| 1   | rs6693503  | 19859880      | 0.4135  | 0.3555  | G  | 18.61 | 1.61E-05 |
| 14  | rs1951054  | 25147247      | 0.3004  | 0.3575  | A  | 18.33 | 1.86E-05 |
| 1   | rs2012235  | 68685342      | 0.2332  | 0.2866  | A  | 18.11 | 2.09E-05 |
| 4   | rs2333255  | 176819759     | 0.4289  | 0.4874  | C  | 17.55 | 2.80E-05 |
| 1   | rs12563321 | 26539088      | 0.2554  | 0.2074  | G  | 17.5  | 2.87E-05 |
| 1   | rs9729637  | 5468038       | 0.09182 | 0.06265 | C  | 17.45 | 2.95E-05 |
| 14  | rs1257670  | 98562725      | 0.3394  | 0.2867  | A  | 17.06 | 3.63E-05 |
| 1   | rs12117956 | 27370168      | 0.305   | 0.3598  | A  | 16.89 | 3.97E-05 |
| 9   | rs7855598  | 137454075     | 0.2262  | 0.1813  | A  | 16.84 | 4.06E-05 |
| 1   | rs4846689  | 219444057     | 0.1156  | 0.0832  | A  | 16.71 | 4.36E-05 |
| 6   | rs6903101  | 138567539     | 0.04625 | 0.02687 | A  | 16.69 | 4.39E-05 |
| 17  | rs917538   | 14975565      | 0.4538  | 0.3978  | C  | 16.6  | 4.61E-05 |
| 1   | rs6687674  | 27409687      | 0.362   | 0.4182  | G  | 16.58 | 4.67E-05 |
| 14  | rs2284230  | 77085649      | 0.175   | 0.2217  | G  | 16.5  | 4.88E-05 |
| 10  | rs3824700  | 26395911      | 0.4953  | 0.4388  | A  | 16.48 | 4.92E-05 |
| 11  | rs7945105  | 131162979     | 0.3653  | 0.4212  | G  | 16.48 | 4.93E-05 |
| 10  | rs1521032  | 26393597      | 0.4946  | 0.4385  | A  | 16.3  | 5.41E-05 |
| 1   | rs10902742 | 26548843      | 0.2372  | 0.1923  | C  | 16.13 | 5.91E-05 |
| 10  | rs11593128 | 26392957      | 0.4946  | 0.4385  | A  | 16.09 | 6.04E-05 |
| 10  | rs3936497  | 28619974      | 0.1034  | 0.0734  | A  | 16    | 6.34E-05 |
| 1   | rs1454356  | 189400411     | 0.3495  | 0.4044  | A  | 15.97 | 6.42E-05 |
| 9   | rs1556047  | 112083819     | 0.5121  | 0.4565  | A  | 15.86 | 6.83E-05 |
| 2   | rs12692335 | 7524145       | 0.2483  | 0.203   | G  | 15.84 | 6.90E-05 |
| 8   | rs10955841 | 119015721     | 0.3718  | 0.3198  | A  | 15.67 | 7.52E-05 |
| 1   | rs9786944  | 5471098       | 0.08914 | 0.06186 | G  | 15.5  | 8.24E-05 |

|    |            |           |         |         |   |       |          |
|----|------------|-----------|---------|---------|---|-------|----------|
| 6  | rs6926282  | 112968480 | 0.128   | 0.09509 | G | 15.43 | 8.55E-05 |
| 21 | rs13049184 | 21818485  | 0.4448  | 0.4998  | G | 15.4  | 8.70E-05 |
| 12 | rs12579612 | 93189923  | 0.2426  | 0.1984  | A | 15.39 | 8.75E-05 |
| 10 | rs1521033  | 26422356  | 0.494   | 0.4395  | G | 15.36 | 8.89E-05 |
| 6  | rs627240   | 81042603  | 0.3834  | 0.4387  | C | 15.33 | 9.04E-05 |
| 15 | rs11636483 | 96937674  | 0.2507  | 0.206   | A | 15.25 | 9.44E-05 |
| 16 | rs16953111 | 78954425  | 0.09987 | 0.07114 | G | 15.17 | 9.83E-05 |

**Table S3. Australian Genome-wide Association Analysis Results ( $p < 10^{-4}$ )**

| <b>CHR</b> | <b>SNP</b> | <b>Position (bp)</b> | <b>F_A</b> | <b>F_U</b> | <b>A2</b> | <b>CHISQ</b> | <b>p Value</b> |
|------------|------------|----------------------|------------|------------|-----------|--------------|----------------|
| 8          | rs10504743 | 82951580             | 0.04752    | 0.09918    | G         | 20.43        | 6.18E-06       |
| 1          | rs10779614 | 212656537            | 0.1777     | 0.2574     | G         | 19.84        | 8.43E-06       |
| 1          | rs6703314  | 104976389            | 0.3244     | 0.2397     | A         | 19.29        | 1.13E-05       |
| 12         | rs6539579  | 80696724             | 0.2562     | 0.3418     | A         | 18.7         | 1.53E-05       |
| 3          | rs4128782  | 89320422             | 0.468      | 0.5607     | G         | 18.57        | 1.64E-05       |
| 7          | rs1829993  | 77698210             | 0.469      | 0.5615     | G         | 18.49        | 1.71E-05       |
| 5          | rs10515600 | 147316068            | 0.3089     | 0.3975     | C         | 18.45        | 1.74E-05       |
| 17         | rs11079098 | 49220927             | 0.3295     | 0.4189     | A         | 18.28        | 1.90E-05       |
| 2          | rs750132   | 218548607            | 0.1508     | 0.09262    | G         | 17.52        | 2.84E-05       |
| 17         | rs3785655  | 14189892             | 0.2996     | 0.3844     | T         | 17.15        | 3.46E-05       |
| 6          | rs9389508  | 137842904            | 0.1405     | 0.08525    | C         | 16.87        | 4.00E-05       |
| 18         | rs4542757  | 48452722             | 0.3068     | 0.391      | T         | 16.72        | 4.32E-05       |
| 7          | rs6967325  | 77678568             | 0.407      | 0.323      | A         | 16.56        | 4.72E-05       |
| 10         | rs2082988  | 128254551            | 0.3409     | 0.4262     | G         | 16.54        | 4.77E-05       |
| 20         | rs6116201  | 4033758              | 0.1498     | 0.218      | A         | 16.47        | 4.93E-05       |
| 20         | rs10485664 | 38064192             | 0.2293     | 0.1607     | A         | 16.48        | 4.93E-05       |
| 17         | rs1859906  | 14191413             | 0.3688     | 0.4549     | G         | 16.47        | 4.95E-05       |
| 9          | rs11144978 | 78415148             | 0.3089     | 0.232      | A         | 16.36        | 5.25E-05       |
| 1          | rs1808973  | 112289357            | 0.4122     | 0.4975     | T         | 15.83        | 6.93E-05       |
| 7          | rs798332   | 77746864             | 0.3946     | 0.3131     | T         | 15.78        | 7.11E-05       |
| 3          | rs7429534  | 89273999             | 0.3564     | 0.4402     | C         | 15.74        | 7.28E-05       |
| 6          | rs6570048  | 136240287            | 0.4287     | 0.5131     | T         | 15.41        | 8.64E-05       |
| 1          | rs3006009  | 242697070            | 0.3533     | 0.4361     | T         | 15.41        | 8.65E-05       |
| 1          | rs11120315 | 212653320            | 0.1126     | 0.1721     | C         | 15.36        | 8.90E-05       |
| 12         | rs12228394 | 19482075             | 0.01756    | 0.04836    | C         | 15.27        | 9.32E-05       |

**Table S4. mRNA of Genes Found to Be Upregulated or Downregulated in UL with the Major Allele of rs4247357 Compared to UL with the Minor Allele**

| Gene                     | Location | Fold Change | Direction | p Value  |
|--------------------------|----------|-------------|-----------|----------|
| <i>MMS19</i>             | 10q24.1  | 1.558       | up        | 7.45E-07 |
| <i>SH3BP4</i>            | 2q37.2   | 1.804       | down      | 8.42E-07 |
| <i>TUBB2A</i>            | 6p25.2   | 2.658       | down      | 1.86E-06 |
| <i>NLN</i>               | 5q12.3   | 1.617       | down      | 2.19E-06 |
| <i>FAM126A/DRCTNNB1A</i> | 7p15.3   | 1.699       | down      | 6.49E-06 |
| <i>STX7</i>              | 6q23.2   | 2.014       | down      | 6.88E-06 |
| <i>PDS5B/KIAA0979</i>    | 13q13.1  | 1.753       | down      | 7.25E-06 |
| <i>CR613961</i>          | 1p36.11  | 2.655       | down      | 7.96E-06 |
| <i>CR749816</i>          | 1p21.2   | 1.817       | down      | 8.49E-06 |
| <i>PMEPA1</i>            | 20q13.31 | 2.284       | down      | 1.16E-05 |
| <i>MAP3K7IP3</i>         | Xp21.2   | 2.581       | down      | 1.17E-05 |
| <i>HOOK3</i>             | 8p11.21  | 1.650       | down      | 1.46E-05 |
| <i>C12orf47</i>          | 12q24.12 | 1.728       | up        | 1.47E-05 |
| <i>ANKRD27</i>           | 19q13.11 | 1.870       | down      | 1.55E-05 |
| <i>RAB6C</i>             | 2q21.1   | 1.407       | down      | 1.71E-05 |
| <i>C6orf162</i>          | 6q15     | 1.585       | up        | 1.82E-05 |
| <i>PICALM</i>            | 11q14.2  | 1.884       | down      | 1.83E-05 |
| <i>c3orf19</i>           | 3p25.1   | 1.310       | up        | 2.07E-05 |
| <i>ZSIG13/FZD4</i>       | 11q14.2  | 2.527       | down      | 2.15E-05 |
| <i>PIAS1</i>             | 15q23    | 1.685       | up        | 2.36E-05 |
| <i>FADS1</i>             | 11q12.2  | 1.948       | down      | 2.38E-05 |
| <i>PHF21A/KIAA1696</i>   | 11p11.2  | 1.343       | up        | 2.45E-05 |
| <i>RBM15</i>             | 1p13.3   | 1.810       | down      | 2.65E-05 |
| <i>DIS3</i>              | 13q22.1  | 1.565       | down      | 2.78E-05 |
